# Supplementary material for: The Plant NF-Y DNA Matrix In Vitro and In Vivo
Source: MDPI journal article supplement (doi:10.3390/plants8100406), 2019-10-10
Supplement: s1 [file s1]

## SUPPLEMENTARY DATA

**a**

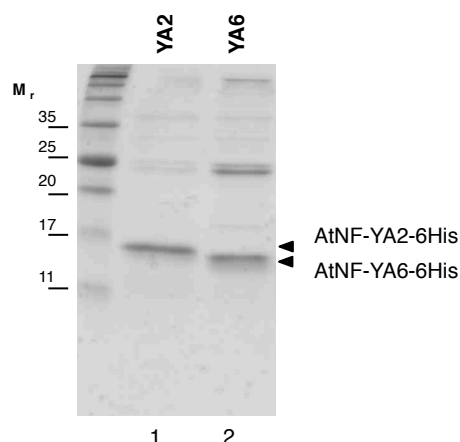

**b**

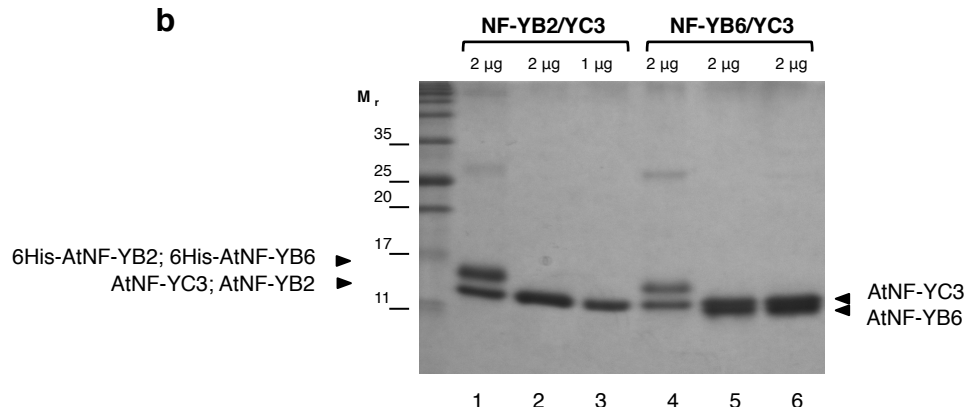

### Figure S1. Recombinant proteins used in EMSAs.

SDS-PAGE gels were stained with Coomassie. Migration of relative molecular weight protein mass standards ( $M_r$ , expressed in kDa) is shown on the left of the gels.

(a) Lanes 1,2: 2  $\mu$ g of IMAC purified 6His-tagged protein samples were loaded for At NF-YA2 and NF-YA6. (b) Lanes 1-3: At NF-YB2/NF-YC3 purified recombinant proteins, before (lane 1) and after (lanes 2, 3) 6His-tag removal by thrombin cleavage and GF purification, were loaded on SDS-PAGE gels. Amounts are indicated per each lane. Note that after proteolysis, cleaved AtNF-YB2 co-migrates with AtNF-YC3. Lanes 4-6: At NF-YB6/NF-YC3 IMAC purified recombinant protein samples, before (6His-tagged, lane 4) and after proteolysis and GF from different protein preparations (lanes 5, 6), used to obtain crystals of At NF-YB6/NF-YC3 [35] (PDB 5G49) were loaded as a reference for AtNF-Y subunits migration. Note that thrombin cleaved AtNF-YB6 (L1L) migrates faster than AtNF-YC3. Thrombin cleaved At NF-YB2/NFYC3 HFD dimers were used in EMSAs shown in this manuscript.

**Table S1 - Oligonucleotides** EMSA probes and competitor oligos used in this work\*

| Name                 | sequence (5'-3')                | label  |
|----------------------|---------------------------------|--------|
| FT CCAAT             | GCACTCATCCAATCCTTTATGGAATCTTCTT | 5' Cy5 |
| CAB2 CCAAT (-65)     | CTTAAATCCAATGAATGAACAGATAAAGAT  | 5' Cy5 |
| CAB2 CCAAT (-65)/ WT | CTTAAATCCAATGAATGAACAGATAAAGAT  | na     |
| CAB2 <sub>25</sub>   | TTAAATCCAATGAATGAACAGATA        | na     |
| CAB2 CCAAT (-245)    | GCTACAACCCAATAACTAAACTTAAAGTAT  | na     |
| Hsp70                | CTTCTGAGCCAATCACCGAGCTCGATGAGGC | na     |
| Hsp70 <sub>25</sub>  | TTCTGAGCCAATCACCGAGCTCGAT       | na     |
| CAB2mut A5n          | CTTAACATCCAATGAATGAACAGATAAAGAT | na     |
|                      | CTTAAGATCCAATGAATGAACAGATAAAGAT | na     |
|                      | CTTAATATCCAATGAATGAACAGATAAAGAT | na     |
| CAB2mut A6n          | CTTAAAcTCCAATGAATGAACAGATAAAGAT | na     |
|                      | CTTAAAgTCCAATGAATGAACAGATAAAGAT | na     |
|                      | CTTAAAtTCCAATGAATGAACAGATAAAGAT | na     |
| CAB2mut T7n          | CTTAAAAaCCAATGAATGAACAGATAAAGAT | na     |
|                      | CTTAAAAcCCAATGAATGAACAGATAAAGAT | na     |
|                      | CTTAAAAgCCAATGAATGAACAGATAAAGAT | na     |
| CAB2mut C8A/ CAB2mut | CTTAAATaCAATGAATGAACAGATAAAGAT  | na     |
| CAB2mut C9A          | CTTAAATCaAATGAATGAACAGATAAAGAT  | na     |
| CAB2mut A10C         | CTTAAATCCcATGAATGAACAGATAAAGAT  | na     |
| CAB2mut A11C         | CTTAAATCCAcTGAATGAACAGATAAAGAT  | na     |
| CAB2mut T12G         | CTTAAATCCAAGGAATGAACAGATAAAGAT  | na     |
| CAB2mut 11C12A       | CTTAAATCCAcaGAATGAACAGATAAAGAT  | na     |
| CAB2mut G13n         | CTTAAATCCAATaAATGAACAGATAAAGAT  | na     |
|                      | CTTAAATCCAATcAATGAACAGATAAAGAT  | na     |
|                      | CTTAAATCCAATtAATGAACAGATAAAGAT  | na     |
| CAB2mut A14n         | CTTAAATCCAATGcATGAACAGATAAAGAT  | na     |
|                      | CTTAAATCCAATGgATGAACAGATAAAGAT  | na     |
|                      | CTTAAATCCAATGtATGAACAGATAAAGAT  | na     |
| CAB2mut A15n         | CTTAAATCCAATGAcTGAACAGATAAAGAT  | na     |
|                      | CTTAAATCCAATGAgTGAACAGATAAAGAT  | na     |
|                      | CTTAAATCCAATGAtTGAACAGATAAAGAT  | na     |
| CAB2mut T16n         | CTTAAATCCAATGAaGAACAGATAAAGAT   | na     |
|                      | CTTAAATCCAATGAAcGAACAGATAAAGAT  | na     |
|                      | CTTAAATCCAATGAAGGAACAGATAAAGAT  | na     |

\*mutant nucleotides are indicated in lowercase. Unlabeled complementary oligos were used for annealing dsDNA oligonucleotide competitors or probes. label: oligo modification; na: unmodified oligo
